# Supplementary material for: Detection of Generalized Tonic–Clonic Seizures in Dogs With a Seizure Detection System Established Using Acceleration Data and the Mahalanobis Distance: A Preliminary Study
Source: PubMed Central journal article supplement (PMC9097225; doi:10.3389/fvets.2022.848604), 2022-04-28
Supplement: Image_1.pdf [file Image_1.pdf]

| Time                 | X-axis avg (g) | Y-axis avg (g) | Z-axis avg (g) | Resultant avg (g) | X-axis cv (g) | Y-axis cv (g) | Z-axis cv (g) | Resultant cv (g) |
|----------------------|----------------|----------------|----------------|-------------------|---------------|---------------|---------------|------------------|
| 20○○○/○○/○○ 10:27:00 | 0.23585667     | 0.25572115     | 0.94563264     | 1.0554526         | 0.42863384    | 0.58072174    | 0.08409472    | 0.067146495      |
| 20○○○/○○/○○ 10:27:01 | 0.23982164     | 0.26510945     | 0.9422667      | 1.0546426         | 0.47810358    | 0.6263182     | 0.0922258     | 0.07586935       |
| 20○○○/○○/○○ 10:27:02 | 0.22422282     | 0.26760256     | 0.9432904      | 1.0540118         | 0.5368596     | 0.6315607     | 0.09436157    | 0.07830152       |
| 20○○○/○○/○○ 10:27:03 | 0.22201782     | 0.26788983     | 0.94498485     | 1.0550516         | 0.49430355    | 0.59799325    | 0.0875614     | 0.07175192       |
| 20○○○/○○/○○ 10:27:04 | 0.189128       | 0.26096818     | 0.9555981      | 1.0544344         | 0.46688333    | 0.49996412    | 0.07735945    | 0.06183452       |
| 20○○○/○○/○○ 10:27:05 | 0.17444256     | 0.2227722      | 0.9676049      | 1.0505434         | 0.37277424    | 0.4631078     | 0.05986796    | 0.047089994      |
| 20○○○/○○/○○ 10:27:06 | 0.16980699     | 0.15381253     | 0.9947251      | 1.0487041         | 0.3324536     | 0.45870128    | 0.04630764    | 0.038756315      |
| 20○○○/○○/○○ 10:27:07 | 0.16140653     | 0.09402873     | 1.0179272      | 1.0486298         | 0.34499964    | 0.4885503     | 0.03693672    | 0.034193344      |
| 20○○○/○○/○○ 10:27:08 | 0.13863334     | 0.06506795     | 1.0285888      | 1.0485132         | 0.40688527    | 0.48714215    | 0.03098419    | 0.03054409       |
| 20○○○/○○/○○ 10:27:09 | 0.09826484     | 0.06683214     | 1.0387025      | 1.049482          | 0.44843736    | 0.43564552    | 0.0253131     | 0.025438279      |
| 20○○○/○○/○○ 10:27:10 | 0.07886149     | 0.06374172     | 1.0427829      | 1.0495228         | 0.4617904     | 0.43128288    | 0.0197062     | 0.018964142      |
| 20○○○/○○/○○ 10:27:11 | 0.09803399     | 0.07066488     | 1.0379735      | 1.0491341         | 0.43710756    | 0.43222567    | 0.01900212    | 0.016784705      |

**Supplementary Figure 1 Information of the eight parameters and 9-s epoch in this study.** Avg and cv denote average and coefficient variation, respectively. The red line square shows an example of the eight parameters. The blue line square depicts an example of the 9-s epoch.
