# Supplementary material for: Detection of Generalized Tonic–Clonic Seizures in Dogs With a Seizure Detection System Established Using Acceleration Data and the Mahalanobis Distance: A Preliminary Study
Source: PubMed Central journal article supplement (PMC9097225; doi:10.3389/fvets.2022.848604), 2022-04-28
Supplement: Image_2.pdf [file Image_2.pdf]

| Time               | X-axis avg (g) | Y-axis avg (g) | Z-axis avg (g) | Resultant avg (g) | X-axis cv (g) | Y-axis cv (g) | Z-axis cv (g) | Resultant cv (g) |
|--------------------|----------------|----------------|----------------|-------------------|---------------|---------------|---------------|------------------|
| 20○○○○○○○ 10:27:00 | 0.23585667     | 0.25572115     | 0.94563264     | 1.0554526         | 0.42863384    | 0.58072174    | 0.08409472    | 0.067146495      |
| 20○○○○○○○ 10:27:01 | 0.23982164     | 0.26510945     | 0.9422667      | 1.0546426         | 0.47810358    | 0.6263182     | 0.0922258     | 0.07586935       |
| 20○○○○○○○ 10:27:02 | 0.22422282     | 0.26760256     | 0.9432904      | 1.0540118         | 0.5368596     | 0.6315607     | 0.09436157    | 0.07830152       |
| 20○○○○○○○ 10:27:03 | 0.22201782     | 0.26788983     | 0.94498485     | 1.0550516         | 0.49430355    | 0.59799325    | 0.0875614     | 0.07175192       |
| 20○○○○○○○ 10:27:04 | 0.189128       | 0.26096818     | 0.9555981      | 1.0544344         | 0.46688333    | 0.49996412    | 0.07735945    | 0.06183452       |
| 20○○○○○○○ 10:27:05 | 0.17444256     | 0.2227722      | 0.9676049      | 1.0505434         | 0.37277424    | 0.4631078     | 0.05986796    | 0.047089994      |
| 20○○○○○○○ 10:27:06 | 0.16980699     | 0.15381253     | 0.9947251      | 1.0487041         | 0.3324536     | 0.45870128    | 0.04630764    | 0.038756315      |
| 20○○○○○○○ 10:27:07 | 0.16140653     | 0.09402873     | 1.0179272      | 1.0486298         | 0.34499964    | 0.4885503     | 0.03693672    | 0.034193344      |
| 20○○○○○○○ 10:27:08 | 0.13863334     | 0.06506795     | 1.0285888      | 1.0485132         | 0.40688527    | 0.48714215    | 0.03098419    | 0.03054409       |
| 20○○○○○○○ 10:27:09 | 0.09826484     | 0.06683214     | 1.0387025      | 1.049482          | 0.44843736    | 0.43564552    | 0.0253131     | 0.025438279      |
| 20○○○○○○○ 10:27:10 | 0.07886149     | 0.06374172     | 1.0427829      | 1.0495228         | 0.4617904     | 0.43128288    | 0.0197062     | 0.018964142      |
| 20○○○○○○○ 10:27:11 | 0.09803399     | 0.07066488     | 1.0379735      | 1.0491341         | 0.43710756    | 0.43222567    | 0.01900212    | 0.016784705      |

 Test dataset 1  
 Test dataset 2  
 Test dataset 3  
 .  
 .  
 .  
 .  
 .  
 .  
 .  
 .  
 .  
 .

**Supplementary Figure 2 How to extract the nonepileptic activity test dataset.** All recorded data were divided into 9-s epochs in the test dataset, which were created repeatedly by shifting the beginning of the 9-s epoch by 1 s. The number of a test dataset generated from the recorded data had the mathematical rule. For instance, if there were 10s recorded data, two 9-s epoch test datasets were generated. If there were 11s data, the number of test datasets would be three. Thus, the number of test datasets will be “the total recorded seconds minus eight”.
